# Supplementary material for: Effect of Whole-Genome Sequencing on the Clinical Management of Acutely Ill Infants With Suspected Genetic Disease: A Randomized Clinical Trial
Source: PubMed Central journal article supplement — JAMA Pediatr. 2021 Sep 27;175(12):1–10. doi: 10.1001/jamapediatrics.2021.3496 (PMC8477301; doi:10.1001/jamapediatrics.2021.3496), 2021-09-27
Supplement: jamapediatr-e213496-s004.pdf [file jamapediatr-e213496-s004.pdf]

## Data Sharing Statement

Krantz. Effect of Whole-Genome Sequencing on the Clinical Management of Acutely Ill Infants With Suspected Genetic Disease. *JAMA Pediatr*. Published September 27, 2021. doi:10.1001/jamapediatrics.2021.3496

### Data

**Data available:** Yes

**Data types:** Deidentified participant data

**How to access data:** Available upon request to the corresponding author, Ryan J Taft PhD [rtaft@illumina.com](mailto:rtaft@illumina.com)

**When available:** With publication

### Supporting Documents

**Document types:** None

### Additional Information

**Who can access the data:** Researchers whose proposed use of the data has been approved

**Types of analyses:** For specific research questions approved by the NICUSeq Study Group.

**Mechanisms of data availability:** After approval of a proposal

**Any additional restrictions:** None
